# Supplementary material
Source: Elsevier journal article supplement (https://comptes-rendus.academie-sciences.fr/geoscience/article/10.1016/j.crte.2014.03.007/file/attach/mmc2.pdf)
Supplement: mmc2 [file mmc2.pdf]

نحو اربعة ايام و بعد بين تطير تمسح اربعة ايام وتروح الى شرة يغالواها المبروك ومن المبروك تمسح اربعة  
 ايام ويوم الخامس تروح له شرة يغالواها بوجيها واما اقلها برايش وكنت واما اولاهم كيه يولدوهم بيض  
 وكيه يفسروا ويسودوا الاجل ارضع حاصي من بوجيها الى الغاية ثلاثة ايام ومن الغاية يرمي انغار ثايت  
 تروح الي تبيكتوا وقي تبيكتوا مدينة كبيرة ولها ثلاثة اصوع واما اسلاطين تكتروا سابقا يغالواها اقلوا الرما  
 وبقوا يغالوا جان وبقوا يغالوا كرا و ابنه التايض وبقوا يغالوا العرب اولاه سيده الشيخ المقتار ولا تبيكتوا الاحد  
 فكل من غلب مع اخذ البلاد وبقوا امانتونا من امرهم واما الجار اولاه الحاج احمد واولاه الحاج احمد واولاه الحاج  
 احمد بن حنا والحيدان بن البلال ومحمد بن احمد الحبيب وبقوا اعرضت اولاه زنا واما اعرض اولاه حيا اكبارهم المبروك  
 واولاه فرمه ومحمد بن الحاج عبد الله اليحياوي واما الشرفاء اهل الوطى واما الشرفاء اهل اولف واهل سلع كبيرهم  
 صاي عن الشريفة وسيد الحبيب بن محرزوا واكبار اهل اولف سمي محمد الواوي بن صلاي احمد ومحمد بن  
 صلاي احمد بن هيمه وولاي الميزيد بن سبيح الواوي وسيد بن علي الشريفي وولاي عبد الملك بن صلاي العربي وشرفنا  
 وشرفنا عن الة وبت السعيه الفرنصوية عنده الناس و عن التوارق وامتوا بقولنا وفادوا لولايتنا منع احد نخرجها  
 به ولا يرا صا لا الخير والعاوية واما سلطان التوارق العيس الذي يحكموا في جميع العرب وتوارق الله به يفتن تبيكتوا  
 وتبع كت والبارايش وافلاذ ولة معة ولة ليحيون بنت جريج من فربا جريج التي زبرج وهي ارضه قريب من سكتوا  
 ابلح العيان الذي كيرهم مبلوا واما سلطان الذي يحكموا في جميع العرب والبلد التي كونا اسمهم  
 تايغ آف قور يغيغ آف بين معانه وبين توات اربعين يوما بين الشرق والقبلة بينضعا التجار اليها  
 ولها ملبة اخطوا المدا تبيغمة ولسنة في وجنح وشيفوا وملكه ومنبجر وموشج وسرف وميفا  
 ما عندهم فلم ولا كتاب من كان منع من كان مسلح يفتن بفتح العرب ومن كان مزوسيا لا عنده فلم ولا كتاب  
 وما يبعد من الا اشجار والاشجار واما معن التبر في الكبير في شيفوا والاشجار في كركار والاشجار  
 في مليج ويغ غنات ويبلغ هبه اخضر ويبس تبيكتوا وسنة تمنية ايام في البر وبين سنة وشيفوا  
 يوم واحد في البر وفي البحر على حسن مشي شفيق وهو تبيكتوا سنة في بر واحد ليس بينم عشر  
 اما جنح قطع الحرم من قبلت وبين سنة وشيفوا يرم واحد في البحر ولا بد اع امشية التي جنح نطعوا  
 البحر وكذا كهنس في نهر النيل واما الاجار معانها كثيرة من غير موضع وجدنا صنها عبد الصرو والملك  
 والبارعا والرخام الاخضر والاشهدا والاحلدا ووجدنا حجر اليا ماني ولا ووجدنا طافه ايش نكسروه بها



معاوية في مكانه عزرة عنه وحاي في سقر اخل وكايه الشب والرازو الطرور والملح المحي واما المحارح  
 اربعة وعشرين زنس او ثمانية اربعة والجهره يتكرنور في بلاد الهند والسحر او اما البافرة على اربعة  
 ازناس اجرة البرهمن الاحمر ربعة الاصفر وبعة السمنج وبعة الزيت وبعة الزنج وبعة  
 وبعة السماوي وبعة اليامني وهو اليامني نوعان الابيض والازرق ولوط الحارج من السمنج  
 واجرة الابيض الشارفا بالبيوض واما حجر اليمنة وبعة في بلاد ناي و صط الحرا الاكلوا اولادها  
 باثنت تكسروا ذلك المحار و خلية في موضعه مثل حب الرمان في و صط الاكل وهو تفلوا بارفوا  
 مثل الزازم الفرمونج يميلوا الى البيوط والى الصغور واما الموضع الغني وبعة فيه الحارة بين  
 والين وفيلج واما الحار اصمغ العرب مرجح في عانة تبختا واشتباره فيها الشوى ويسمونه  
 بالنظيم فرنابي وشجرة ارج الناس يقال لها خاشع واما الصمغ الذي يخرج منها يسمى  
 توراريم يابري واما شجرة ثمان يقال لها قنج و كانت شجرة الجادو يقال لها تاي و اما اولادها  
 مثل الزيتون تجعلون منه زيت واما شجرة البخور الاكل يقال لها مشع و اما اولادها يجعلون  
 منه الزيت ير طبوا الجدية ويسمونها الجري من الجابج والبقر و عنة هم خلد مثل السمك لها ثمر تجعلون  
 منه دهن ابيض واما العلقه التي في و صط الثمره تجعلون منها دهن ابيض يسعلون به ويغاثون  
 به الاجراح و عنة هم شجرة يقال لها قمايم وهي شجرة كبيرة يقال لها كوكا و لها اولاد  
 كبار مثل البتيغ و اخ اكسرها وبعة و ابي و صطها مثل التي في قوا تجعلون في الماء يرحصوا  
 في ذلك الماء حاصضا حارتي مثل لبنه واما الشجرة التي تجعلون ما فشورها حبل في اخ  
 جاء الاحد المرار حرقا في ذلك الجبلد في الماء وشراء في ذلك الماء تفي المرار يقال لها تشيا  
 وعانة شجرة يقال لها كنبالها اولاد مثل الحوزة حاريت مثل البليج واما الصمد يقال له زمو  
 و اما فيلج اربعة بلدان السكيس زاويت ابدان الصلح و قربا منها الخشاش و قربا من الخشاش  
 المنصور و من ناحية الفبال للخراب ساقل و اما اتوان البلدان الكبار خمسة الغني فيع سوق  
 و حرا لها بلغنا ما ثورات و فله منا الى مزاب و فله منا الى تفرق فسمعتا بسيد في الحارج عبة الحميد  
 يبي فرحنا اليه فرجنا ناه رعد عد قل ويصرف الصخر حقا و كان يمشي ويفيموا في كل بلاد و يميلوا  
 فيها معاب وبعة واخرها صالان بس ابرفة ناسها في نسي الخا مع يس رجل يمشي بسياسة



لعمري يفتن بدمته ولا يخف ولا يحنى ولا يتردد ولا يتردد  
نريد وانصروا الى برتديتوا ولقد لعين الشريف متعس من فقه امنا وفلنا له اص  
حتى نقتطع عزة الشريف ونروح انا وتمامك التي تبتعدوا لا تتبع رحمت  
لها سابقا صرتين ولكن في هذه الوقت الحاجة  
في المشي وفان الي حتى انا مرافقك

صاحب حتى يتسرح الطريف

وانا اعرفوا كيف المشي

لان المشي في

هذه الوفاة

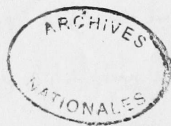

لا يصلح

بنا

وسلام ماعنه الحاج عميد العاذر

شواتي بن بويحيى الطلوي

نسبنا

١٣٦٦ هـ

*Pour copie conforme  
Kadi Abd-el-Kader Bey*

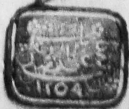

F17/2957<sup>R</sup>

Supplementary material 2 : Et-Touaty's manuscript (AN: F/17/2957/B, pièce 139; see Note 2 in Appendix A).
